# Supplementary material for: Analyzing the brainstem circuits for respiratory chemosensitivity in freely moving mice
Source: eLife. 2022 Oct 27;11:e70671. doi: 10.7554/eLife.70671 (PMC9643001; doi:10.7554/eLife.70671)
Supplement: Figure 1—figure supplement 7—source data 1. [file elife-70671-fig1-figsupp7-data1.xlsx]

## Sheet: Sheet4
RTN												Raphe
EA			EG			NC			I			EA			EG			I
0.03	0.06		0.03	0.06		0.03	0.06		0.03	0.06		0.03	0.06		0.03	0.06		0.03	0.06
1801.93	-957.451		260.858	680.596		-154.035	-238.92		-2402.96	-1419.25		593.374	254.205		3010.52	5949.65		-6412.32	-7397.75
471.697	556.834		573.506	2706.34		-99.1782	-146.151		-4161.96	-5766.81		582.056	238.362		1632.14	3057.17		-5132.29	-5537.18
1228.2	847.676		909.416	5836.44		-829.823	-185.643		-2933.13	-3075.06		1279.62	1332.54		256.281	932.393		-5447.08	-5852.66
2066.59	69.9926		83.5906	1737.44		440.586	214.65		-3077.11	-3686.21		941.162	464.97		1171.43	6123.96		-2270.23	-3144.13
2005.62	-557.668					-630.12	-758.498		-1240.61	-1734.64					265.966	3858.11		-4512.8	-4376.71
1044.35	23.7312					-450.199	-322.324								2238.54	4277.1		-6481.17	-7013.11
843.859	105.485					-60.4299	-245.547								2929	5845.22		-3239.75	-3819.83
2144.19	-20.2146					0.17759	-36.3045								2097.48	2650.85		-2248.55	-4330.09
2625.91	559.47					82.5477	379.851											-1031.6	-2684.9
2081.07	795.131					-428.466	-1112.73											1536.23	-926.052
1951.18	-414.823					-388.373	-155.941
1673.39	1295.94					-657.235	-420.264
1366.06	-863.698					-728.816	-425.565
456.512	-934.609					187.084	-29.7496
929.901	515.364					-276.523	-50.3022
1280.78	243.765					-91.1173	-253.216
1654.03	909.456					-155.011	281.868
60.8629	-318.429					-487.825	-20.8236
1428.23	370.324					-31.2723	-34.7483
2348.06	609.418					566.998	-578.799
1128.02	73.7556					-368.244	-958.336
2260.74	540.467					-1358.61	-1223.5
2361.37	1118.49
1396.03	901.255
