# Supplementary material for: Analyzing the brainstem circuits for respiratory chemosensitivity in freely moving mice
Source: eLife. 2022 Oct 27;11:e70671. doi: 10.7554/eLife.70671 (PMC9643001; doi:10.7554/eLife.70671)
Supplement: Figure 3—source data 1. [file elife-70671-fig3-data1.xlsx]

## Sheet: Sheet2
		Time of Ca2+ event (sec)	Time (sec) when Ca2+ activity start to rise relative to sniff
	Cell-2
		44.194	1.23692
		110.997	1.16234
		173.384	-0.406016
		202.186	-0.111602
		228.604	-0.255931
		276.552	0.13843
		340.6	-0.67765
		396.814	1.12138
		455.8	-1.23192
		573.002	0.531184
	Cell-2
		135.59	-0.120186
		171.4	-0.838086
		200.18	-0.729699
		228.625	-0.259329
		276.19	-0.243233
	Cell-3
		110.602	1.16234
		137.195	0.509717
		171.593	-0.653515
		199.99	-0.918033
		228.22	-0.660696
		340.789	-0.517051
		396.209	0.52134
		449.008	-0.56159
		456.223	-0.839082
		462.397	-0.447876
		475.409	-0.43609
		570.426	0.179974
		578.795	-0.620909
