# Supplementary material for: Analyzing the brainstem circuits for respiratory chemosensitivity in freely moving mice
Source: eLife. 2022 Oct 27;11:e70671. doi: 10.7554/eLife.70671 (PMC9643001; doi:10.7554/eLife.70671)
Supplement: Figure 4—figure supplement 2—source data 1. [file elife-70671-fig4-figsupp2-data1.xlsx]

## Sheet: RTN and Raphe
	NEURONS
		Tidal volume (VT) (mL)
		RTN						Raphe
		20152	18075	18137	19024	19203	19204	18212	18213	19062	19145	19161	19162
	0	0.0293262	0.0198329	0.0194151	0.0194614	0.0116337	0.012241	0.0103988	0.0279637	0.0187887	0.0150742	0.0145947	0.0169314
	0.03	0.0339725	0.0288681	0.0239448	0.0207269	0.0238166	0.0160197	0.0176778	0.0447558	0.0210041	0.0177099	0.0229156	0.0259322
	0.06	0.0385224	0.0373403	0.0318719	0.0308843	0.0381224	0.0307029	0.0293798	0.0440424	0.0235117	0.0301084	0.0425694	0.0238248
	Recovery	0.0299492	0.0196385	0.0260163	0.0176193	0.015823	0.0172278	0.0174086	0.031377	0.0187198	0.0247395	0.0145941	0.0175098
	VT normalised to body weight (mL/g)
		20152	18075	18137	19024	19203	19204	18212	18213	19062	19145	19161	19162
	0	0.00115005	0.000637713	0.000741036	0.000678099	0.000440669	0.000501681	0.000444394	0.0011799	0.00066391	0.000528921	0.000621051	0.000755867
	0.03	0.00133225	0.000928236	0.000913924	0.000722191	0.000902144	0.000656547	0.000755463	0.00188843	0.000742196	0.000621402	0.000975132	0.00115769
	0.06	0.00151068	0.00120065	0.00121648	0.00107611	0.00144403	0.00125832	0.00125555	0.00185833	0.000830803	0.00105643	0.00181146	0.00106361			NEURONS
	Recovery	0.00117448	0.000631464	0.00099299	0.000613915	0.000599356	0.000706057	0.000743959	0.00132393	0.000661475	0.000868052	0.000621024	0.000781687			RTN			Raphe
																Mean	SD		Mean	SD
	Normalised VT (μL/g)
		20152	18075	18137	19024	19203	19204	18212	18213	19062	19145	19161	19162			Normalised VT (μL/g)
	0	1.15005	0.637713	0.741036	0.678099	0.440669	0.501681	0.444394	1.1799	0.66391	0.528921	0.621051	0.755867			0.691541	0.250894		0.699008	0.25906
	0.03	1.33225	0.928236	0.913924	0.722191	0.902144	0.656547	0.755463	1.88843	0.742196	0.621402	0.975132	1.15769			0.909216	0.235888		1.02339	0.464997
	0.06	1.51068	1.20065	1.21648	1.07611	1.44403	1.25832	1.25555	1.85833	0.830803	1.05643	1.81146	1.06361			1.28438	0.162714		1.3127	0.426541
	Recovery	1.17448	0.631464	0.99299	0.613915	0.599356	0.706057	0.743959	1.32393	0.661475	0.868052	0.621024	0.781687			0.786376	0.2402		0.833354	0.255794
		Breathing Frequency (bpm)
		RTN						Raphe
		20152	18075	18137	19024	19203	19204	18212	18213	19062	19145	19161	19162			Breathing Frequency (bpm)
	0	175.129	250.291	145	163.848	191.787	191.437	220.831	280.809	130.351	167.768	161.618	204.142			186.249	36.0165		194.253	53.1908
	0.03	188.225	268.491	201	208.512	209.31	211.013	261.696	328.29	252.311	207.373	203.543	254.163			214.425	27.7942		251.23	45.2881
	0.06	204.089	366.262	281	254.113	321.87	307.068	353.486	380.534	305.623	288.358	278.304	320.5			289.067	56.3333		321.134	39.3055
	Recovery	163.574	339.637	181	195.251	162.847	181.921	317.209	324.596	198.083	198.561	182.62	171.995			204.038	67.5549		232.177	69.4866
	Minute ventilation (VE) (μL/g/min)
		RTN						Raphe
		20152	18075	18137	19024	19203	19204	18212	18213	19062	19145	19161	19162			Minute ventilation (VE) (μL/g/min)
	0	201.407	159.614	107.45	111.105	84.5145	96.0405	98.136	331.328	86.541	88.7358	100.373	154.304			126.688	44.7164		143.236	95.4537
	0.03	250.764	249.223	183.699	150.586	188.828	138.54	197.702	619.953	187.264	128.862	198.481	294.242			193.607	47.6746		271.084	178.972
	0.06	308.314	439.752	341.832	273.453	464.79	386.39	443.819	707.157	253.913	304.631	504.138	340.886			369.089	74.8788		425.757	165.566
	Recovery	192.114	214.469	179.731	119.868	97.6031	128.447	235.99	429.741	131.027	172.362	113.411	134.446			155.372	46.3866		202.83	119.452

## Sheet: pFL
		Normalised VT (μL/g)
		19116	19225	19187		mean	SD
	0	1.9697	1.6609	2.17054		1.93371	0.25672
	0.06	4.92424	4.63668	6.78295		5.44796	1.16504
	0.09	6.43939	6.92042	10.9302		8.09668	2.46569
	Recovery	2.46212	4.39446	4.57364		3.81008	1.1708
		Breathing Frequency (bpm)
	0	162	143	163		156	11.2694
	0.06	201	280	222		234.333	40.9186
	0.09	287	304	252		281	26.5141
	Recovery	151	164	159		158	6.55744
		Minute ventilation (VE) (μL/g/min)
	0	319.091	237.509	353.798		303.466	59.6987
	0.06	989.773	1298.27	1505.81		1264.62	259.661
	0.09	1848.11	2103.81	2754.42		2235.44	467.276
	Recovery	371.78	720.692	727.209		606.561	203.352
