# Supplementary material for: Analyzing the brainstem circuits for respiratory chemosensitivity in freely moving mice
Source: eLife. 2022 Oct 27;11:e70671. doi: 10.7554/eLife.70671 (PMC9643001; doi:10.7554/eLife.70671)
Supplement: Figure 7—source data 1. [file elife-70671-fig7-data1.xlsx]

## Sheet: Neuron vs VT histo
	CO2	time
	0.06	-0.114			Count of time	Column Labels
	0.06	-0.114			Row Labels	0.06	0.09	Grand Total
	0.06	-0.206			-3.3--3.1	1		1
	0.06	-0.206			-2.1--1.9	1		1
	0.06	-0.206			-1.7--1.5	3		3
	0.06	-0.206			-1.5--1.3	1		1
	0.06	-0.221			-1.3--1.1	1		1
	0.06	-0.221			-1.1--0.9	1		1
	0.06	-0.121			-0.9--0.7		4	4
	0.06	-0.214			-0.7--0.5	2	5	7
	0.06	-0.214			-0.5--0.3		6	6
	0.06	-0.214			-0.3--0.0999999999999998	21	50	71
	0.06	-0.128			-0.0999999999999996-0.1	10	4	14
	0.06	-0.214			0.1-0.3	6		6
	0.06	-1.6			Grand Total	47	69	116
	0.06	-0.091
	0.06	-0.185
	0.06	-0.185
	0.06	-0.146
	0.06	-0.192
	0.06	-0.039
	0.06	-0.039
	0.06	0.148
	0.06	0.055
	0.06	0.137
	0.06	0.049
	0.06	0.148
	0.06	0.148
	0.06	-0.138
	0.06	0.143
	0.06	-0.039
	0.06	-0.248
	0.06	0.049
	0.06	-0.044
	0.06	-1.94
	0.06	-1.11
	0.06	-0.93
	0.06	-1.62
	0.06	-1.55
	0.06	-1.46
	0.06	-3.13
	0.06	0.15
	0.06	-0.04
	0.06	-0.54
	0.06	-0.63
	0.06	-0.04
	0.06	-0.21
	0.09	-0.025
	0.09	-0.124
	0.09	-0.224
	0.09	-0.185
	0.09	-0.025
	0.09	-0.12
	0.09	-0.224
	0.09	-0.12
	0.09	-0.269
	0.09	-0.269
	0.09	-0.12
	0.09	-0.12
	0.09	-0.025
	0.09	-0.319
	0.09	-0.24
	0.09	-0.623
	0.09	-0.2
	0.09	-0.246
	0.09	-0.259
	0.09	-0.176
	0.09	-0.126
	0.09	-0.118
	0.09	-0.126
	0.09	-0.126
	0.09	-0.21
	0.09	-0.126
	0.09	-0.298
	0.09	-0.195
	0.09	-0.309
	0.09	-0.126
	0.09	-0.126
	0.09	-0.218
	0.09	-0.218
	0.09	-0.126
	0.09	-0.51
	0.09	-0.656
	0.09	-0.744
	0.09	-0.65
	0.09	-0.725
	0.09	-0.744
	0.09	-0.191
	0.09	-0.176
	0.09	-0.264
	0.09	-0.283
	0.09	-0.283
	0.09	0.015
	0.09	-0.177
	0.09	-0.287
	0.09	-0.184
	0.09	-0.268
	0.09	-0.291
	0.09	-0.291
	0.09	-0.191
	0.09	-0.291
	0.09	-0.86
	0.09	-0.246
	0.09	-0.246
	0.09	-0.246
	0.09	-0.246
	0.09	-0.246
	0.09	-0.246
	0.09	-0.636
	0.09	-0.43
	0.09	-0.246
	0.09	-0.346
	0.09	-0.246
	0.09	-0.246
	0.09	-0.338
	0.09	-0.338

## Sheet: Neuron vs f histo
	CO2	time
	0.06	-0.086			Count of time	Column Labels
	0.06	-0.086			Row Labels	0.06	0.09	(blank)	Grand Total
	0.06	-0.178			<-3 or (blank)
	0.06	-0.178			-3--2.8	1			1
	0.06	-0.178			-1.4--1.2		1		1
	0.06	-0.178			-1--0.8	1			1
	0.06	-0.193			-0.8--0.6		1		1
	0.06	-0.193			-0.6--0.4	2			2
	0.06	-0.093			-0.4--0.2	5	18		23
	0.06	-0.186			-0.2-2.77555756156289E-16	23	34		57
	0.06	-0.186			0-0.2	10	14		24
	0.06	-0.186			0.2-0.4	1			1
	0.06	-0.1			0.6-0.8	2			2
	0.06	-0.186			0.8-1	1			1
	0.06	-2.81			Grand Total	46	68		114
	0.06	-0.107
	0.06	-0.201
	0.06	-0.201
	0.06	-0.162
	0.06	-0.208
	0.06	-0.039
	0.06	-0.039
	0.06	0.148
	0.06	0.055
	0.06	0.137
	0.06	0.049
	0.06	0.148
	0.06	0.148
	0.06	-0.138
	0.06	0.143
	0.06	-0.039
	0.06	-0.248
	0.06	0.049
	0.06	-0.044
	0.06	-0.11
	0.06	-0.04
	0.06	0.14
	0.06	-0.55
	0.06	-0.48
	0.06	-0.39
	0.06	-0.81
	0.06	0.96
	0.06	0.77
	0.06	0.27
	0.06	0.18
	0.06	0.77
	0.09	-0.035
	0.09	-0.134
	0.09	-0.234
	0.09	-0.195
	0.09	-0.035
	0.09	-0.13
	0.09	-0.234
	0.09	-0.13
	0.09	-0.279
	0.09	-0.279
	0.09	-0.13
	0.09	-0.13
	0.09	-0.035
	0.09	-0.329
	0.09	-1.21
	0.09	-0.623
	0.09	-0.2
	0.09	-0.063
	0.09	-0.259
	0.09	-0.176
	0.09	-0.077
	0.09	-0.069
	0.09	-0.077
	0.09	-0.077
	0.09	-0.161
	0.09	-0.077
	0.09	-0.249
	0.09	-0.146
	0.09	-0.26
	0.09	-0.077
	0.09	-0.077
	0.09	-0.169
	0.09	-0.169
	0.09	-0.077
	0.09	-0.31
	0.09	-0.069
	0.09	-0.157
	0.09	-0.246
	0.09	-0.138
	0.09	-0.157
	0.09	-0.145
	0.09	-0.13
	0.09	-0.218
	0.09	-0.237
	0.09	-0.237
	0.09	0.061
	0.09	-0.131
	0.09	-0.241
	0.09	-0.138
	0.09	-0.222
	0.09	-0.245
	0.09	-0.245
	0.09	-0.145
	0.09	-0.245
	0.09	0.191
	0.09	0.191
	0.09	0.191
	0.09	0.191
	0.09	0.191
	0.09	0.191
	0.09	-0.199
	0.09	0.007
	0.09	0.191
	0.09	0.091
	0.09	0.191
	0.09	0.191
	0.09	0.099
	0.09	0.099

## Sheet: Neuron vs EXP histo
	Neuron vs Exp histo
	CO2	time		Count of time	Column Labels
	0.06	-0.417		Row Labels	0.06	0.09	Grand Total
	0.06	-0.417		-1.8--1.6	1		1
	0.06	-0.509		-1.6--1.4	2		2
	0.06	-0.509		-1.4--1.2	2		2
	0.06	-0.509		-1.2--1	2		2
	0.06	-0.509		-1--0.8	5		5
	0.06	-0.524		-0.8--0.6	7	2	9
	0.06	-0.524		-0.6--0.4	23	3	26
	0.06	-0.424		-0.4--0.2	5	39	44
	0.06	-0.517		-0.2-5.55111512312578E-17		25	25
	0.06	-0.517		Grand Total	47	69	116
	0.06	-0.517
	0.06	-0.431
	0.06	-0.517
	0.06	-1.62
	0.06	-0.218
	0.06	-0.312
	0.06	-0.312
	0.06	-0.273
	0.06	-0.319
	0.06	-0.652
	0.06	-0.652
	0.06	-0.465
	0.06	-0.558
	0.06	-0.476
	0.06	-0.564
	0.06	-0.465
	0.06	-0.465
	0.06	-0.751
	0.06	-0.47
	0.06	-0.652
	0.06	-0.861
	0.06	-0.564
	0.06	-0.657
	0.06	-0.811
	0.06	-0.98
	0.06	-0.8
	0.06	-1.49
	0.06	-1.42
	0.06	-1.33
	0.06	-1.312
	0.06	-0.41
	0.06	-0.6
	0.06	-1.1
	0.06	-1.19
	0.06	-0.6
	0.06	-0.94
	0.09	-0.025
	0.09	-0.124
	0.09	-0.224
	0.09	-0.185
	0.09	-0.025
	0.09	-0.12
	0.09	-0.224
	0.09	-0.12
	0.09	-0.269
	0.09	-0.269
	0.09	-0.12
	0.09	-0.12
	0.09	-0.025
	0.09	-0.319
	0.09	-0.424
	0.09	-0.707
	0.09	-0.284
	0.09	-0.33
	0.09	-0.343
	0.09	-0.26
	0.09	-0.126
	0.09	-0.118
	0.09	-0.126
	0.09	-0.126
	0.09	-0.21
	0.09	-0.126
	0.09	-0.298
	0.09	-0.195
	0.09	-0.309
	0.09	-0.126
	0.09	-0.126
	0.09	-0.218
	0.09	-0.218
	0.09	-0.126
	0.09	-0.579
	0.09	-0.162
	0.09	-0.25
	0.09	-0.156
	0.09	-0.231
	0.09	-0.25
	0.09	-0.191
	0.09	-0.176
	0.09	-0.264
	0.09	-0.283
	0.09	-0.283
	0.09	-0.276
	0.09	-0.177
	0.09	-0.287
	0.09	-0.184
	0.09	-0.268
	0.09	-0.291
	0.09	-0.291
	0.09	-0.191
	0.09	-0.291
	0.09	-0.294
	0.09	-0.246
	0.09	-0.246
	0.09	-0.246
	0.09	-0.246
	0.09	-0.246
	0.09	-0.246
	0.09	-0.636
	0.09	-0.43
	0.09	-0.246
	0.09	-0.346
	0.09	-0.246
	0.09	-0.246
	0.09	-0.338
	0.09	-0.338
