# Supplementary material for: Analyzing the brainstem circuits for respiratory chemosensitivity in freely moving mice
Source: eLife. 2022 Oct 27;11:e70671. doi: 10.7554/eLife.70671 (PMC9643001; doi:10.7554/eLife.70671)
Supplement: Supplementary file 1. — (i) no adapting component in the VT response to hypercapnia; and (ii) an adapting VT component in the response to hypercapnia is present. This should be compared to the data shown in Figure 2J. [file elife-70671-supp1.xlsx]

## Sheet: Sheet1
	Time	F/F0	Vt sustained	Vt adapting
	0	0	0	0
	1	0.164019	0.00995017	0.329033
	2	0.269919	0.0198013	0.541818
	3	0.334249	0.0295545	0.671453
	4	0.369126	0.0392106	0.742173
	5	0.3834	0.0487706	0.771678
	6	0.383513	0.0582355	0.772849
	7	0.374129	0.0676062	0.755018
	8	0.358611	0.0768837	0.72491
	9	0.339364	0.0860688	0.687335
	10	0.318092	0.0951626	0.645701
	11	0.295988	0.104166	0.602392
	12	0.27387	0.11308	0.559049
	13	0.25229	0.121905	0.51677
	14	0.231601	0.130642	0.476267
	15	0.212021	0.139292	0.437972
	16	0.193667	0.147856	0.402119
	17	0.176587	0.156335	0.368807
	18	0.160782	0.16473	0.338038
	19	0.146223	0.173041	0.309749
	20	0.132857	0.181269	0.28384
	21	0.12062	0.189416	0.260182
	22	0.109443	0.197481	0.238634
	23	0.0992511	0.205466	0.219049
	24	0.0899714	0.213372	0.20128
	25	0.0815319	0.221199	0.185184
	26	0.0738638	0.228948	0.170623
	27	0.066902	0.236621	0.157466
	28	0.0605852	0.244216	0.145592
	29	0.0548566	0.251736	0.134887
	30	0.0496637	0.259182	0.125245
	31	0.0449578	0.266553	0.116571
	32	0.0406945	0.273851	0.108774
	33	0.036833	0.281076	0.101774
	34	0.0333361	0.28823	0.0954952
	35	0.0301698	0.295312	0.0898709
	36	0.0273033	0.302324	0.084839
	37	0.0247084	0.309266	0.0803434
